# Supplementary material for: Overexpression of a Novel ROP Gene from the Banana (MaROP5g) Confers Increased Salt Stress Tolerance
Source: MDPI journal article supplement (doi:10.3390/ijms19103108), 2018-10-11
Supplement: s1 [file s1]

>MaRop5g

ATGAGCGCGTCGAGGTTTATAAAGTGCCTCACGGTGGGGGACGGTGCCGTCGGCAAGACTTGCATGCTTAT  
CTCCTACACCAGCAACACTTTCCCCACGGATTATGTTCTACCGTTTTTGACAATTCAGCGCAAATGTAGTG  
GTGGATGGTAACACAGTTAACTTAGGTTTGTGGGATACTGCAGGCCAAGAGGATTACAATAGATTAAGACCT  
TTGAGCTACCGTGGTGCAGATGTTTTCTTGCTTGCTTTCTCTCATTAGTAAAGCCAGCTATGAAAATGTTGC  
CAAGAAGTGGATTCTGAGCTAAGGCACTATGCACCTGGTGTGCCATAATTCTTGTTGGAACAAAGCTTGA  
TCTTCGGGATGAGCAGCAGTTCTTTATAGATCACCCAGGTGCTGTTCCATAAGTACCGCTCAGGGGGAGGA  
GCTGCGGAAGCAAATAGGTGCTGCTTCGTACATAGAGTGCAGTTCAAAGACTCAGCAAAATGTCAAGGCGG  
TATTTGATGCGGCCATCAAGGTCGTGCTTCAGCCACCAAGCAGAAGAAGAAAAAAGCAACAGAAAGG  
TTGCTCCATATTGTGA

MSASRFIKCVTVGDGAVGKTCMLISYTSNTFPTDYVPTVFDNFSANVVVDGNTVNLGLWD  
TAGQEDYNRLRPLSYRGADVFLAFSLISKASYENVAKKWIPELRHYAPGVPIILVGTKL  
DLRDEQQFFIDHPGAVPISTAQGEELRKQIGAASYIECSSKTQQNVKAVFDAAIKVVLQP  
PKQKKKKKQKGCIL-

**Figure S1.** Full-length cDNA and amino acid sequence of *MaROP5g* from banana plants.

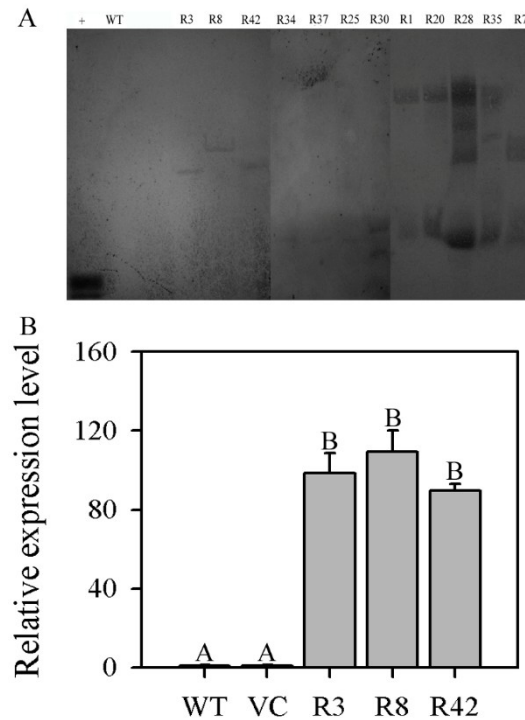

**Figure S2.** Southern blot analysis and qRT-PCR analysis of *MaROP5g* transgenic plants in *A. thaliana*. (A) Southern blot; (B) qRT-PCR. +: positive control. WT: wild-type. R3, R8, R42, R34, R37, R25, R30, R1, R20, R28, R35, R71: *MaROP5g* transgenic plants.
