# Supplementary material for: Overexpression of a Novel ROP Gene from the Banana (MaROP5g) Confers Increased Salt Stress Tolerance
Source: Int J Mol Sci. 2018 Oct 11;19(10):3108. doi: 10.3390/ijms19103108 (PMC6213407; doi:10.3390/ijms19103108)
Supplement: Supplementary file 1 [file ijms-19-03108-s001.zip]

Archive with 6 entries (6 files):
- Figure S1&S2.pdf
- Table S1.xlsx
- Table S2.xlsx
- Table S3.xlsx
- Table S4.xlsx
- Table S5.xlsx
