# Supplementary material for: Overexpression of a Novel ROP Gene from the Banana (MaROP5g) Confers Increased Salt Stress Tolerance
Source: Int J Mol Sci. 2018 Oct 11;19(10):3108. doi: 10.3390/ijms19103108 (PMC6213407; doi:10.3390/ijms19103108)
Supplement: Supplementary file 1 [file ijms-19-03108-s001.zip › Table S1.xlsx]

## Sheet: Table S1
Table S1. Characteristics of ROP proteins in banana plants
Gene name	Gene ID	Amino acid residues	Molecular mass (kDa)	pIs
MaRop2a	Ma06_p28470.1	210	23.13	9.24
MaRop2b	Ma08_p28000.1	209	22.845	9.43
MaRop2c	Ma09_p06140.1	210	22.979	9.24
MaRop3a	Ma02_p00930.1	213	23.784	9.41
MaRop3b	Ma06_p38000.1	210	23.416	9.5
MaRop3c	Ma03_p06030.1	214	23.758	9.18
MaRop5a	Ma01_p19660.1	197	21.451	8.61
MaRop5b	Ma03_p27830.1	197	21.654	8.81
MaRop5c	Ma04_p22420.1	198	21.925	9.35
MaRop5d	Ma07_p03930.1	195	21.297	8.99
MaRop5e	Ma07_p19060.1	196	21.563	9.08
MaRop5f	Ma08_p34250.1	197	21.51	8.97
MaRop5h	Ma04_p04870.1	197	21.685	9.21
MaRop5g	Ma09_p21130.1	196	21.592	9.11
MaRop6	Ma01_p08290.1	197	21.736	8.74
MaRop7a	Ma06_p15280.1	196	21.868	9.21
MaRop7b	Ma10_p15260.1	196	21.798	9.15
