# Supplementary material for: Overexpression of a Novel ROP Gene from the Banana (MaROP5g) Confers Increased Salt Stress Tolerance
Source: Int J Mol Sci. 2018 Oct 11;19(10):3108. doi: 10.3390/ijms19103108 (PMC6213407; doi:10.3390/ijms19103108)
Supplement: Supplementary file 1 [file ijms-19-03108-s001.zip › Table S2.xlsx]

## Sheet: TableS2
Table S2. Conserved amino acid motifs and functional annotation of banana MaROPs
Name	E-value	Position	Motif sequence	Annotation
1	8.6e-730	17	LWDTAGQEDYNRLRPLSYRGADVFLLAFSLISKASYENVAKKWIPELRHY	RhoGEF
2	2.2e-697	17	FIKCVTVGDGAVGKTCMLISYTSNTFPTDYVPTVFDNFSANVVVDGSTVN	RhoGEF
3	6.6E-617	17	DHPGAVPITTAQGEELRKQIGAAAYIECSSKTQQNVKAVFDAAIKVVLQP	RhoGEF
4	5.3e-222	17	APGVPIILVGTKLDLRDDKQF	RhoGEF
5	5.2e-72	17	KKKKKKKKQKGCSIL	NO
6	1.1	3	NFVCGGTC	NO
7	620	2	NIPCRRKLLC	NO
8	6000	2	MSSGAS	NO
9	620000	2	MAASVF	NO
10	1900000	2	NFARGR	NO
