# Supplementary material for: Overexpression of a Novel ROP Gene from the Banana (MaROP5g) Confers Increased Salt Stress Tolerance
Source: Int J Mol Sci. 2018 Oct 11;19(10):3108. doi: 10.3390/ijms19103108 (PMC6213407; doi:10.3390/ijms19103108)
Supplement: Supplementary file 1 [file ijms-19-03108-s001.zip › Table S3.xlsx]

## Sheet: Table S3
Table S3. Expression of banana MaROPs in BaXi Jiao (BX) and Fen Jiao (FJ) bananas after various abiotic stress treatments
Gene ID	Gene name	BX-Cold	BX-Salt	BX-Osmotic	FJ-Cold	FJ-Salt	FJ-Osmotic
Ma09_t06140.1	MaRop2c	0	0	0.41	0	0.23	0
Ma02_t00930.1	MaRop3a	0	0	0	0	0.44	0
Ma06_t38000.1	MaRop3b	35.34	27.54	17.66	40.59	64.01	32.76
Ma03_t06030.1	MaRop4	0	0	0	0	0.22	0
Ma01_t19660.1	MaRop5a	20.34	25.5	33.93	17.04	24.63	25.84
Ma03_t27830.1	MaRop5b	0.51	0.9	0	1.62*	0.24*	1.69*
Ma04_t22420.1	MaRop5c	17.98	20.12	21.41	9.13	20.03	11.55
Ma07_t03930.1	MaRop5d	2.53	1.13	0.91	2.46	1.68	1.43
Ma08_t34250.1	MaRop5f	11.79	13.04	13.46	19.17	22.03	27.27
Ma01_t08290.1	MaRop5h	2.51	4.26	5.31	8.93*	17.75*	20.38*
Ma09_t21130.1	MaRop5g	25.47	36.98	28.64	24.96	29.73	27.48
Ma04_t04870.1	MaRop6	0	0	0.66	0	0.24	2.40*
Ma06_t15280.1	MaRop7a	0.76	0	0	0	0	0
Ma10_t15260.1	MaRop7b	0	0	0	0.82	0.72	1.2
*P < 0.05 and **P < 0.01 between BX and FJ
