# Supplementary material for: Overexpression of a Novel ROP Gene from the Banana (MaROP5g) Confers Increased Salt Stress Tolerance
Source: Int J Mol Sci. 2018 Oct 11;19(10):3108. doi: 10.3390/ijms19103108 (PMC6213407; doi:10.3390/ijms19103108)
Supplement: Supplementary file 1 [file ijms-19-03108-s001.zip › Table S4.xlsx]

## Sheet: Table S4
Table S4. Correlation analysis between RNA-seq and qRT-PCR data
MaRop3b
	RNA-seq data	qRT-PCR data
RNA-seq data	1
qRT-PCR data	0.9989	1
MaRop5a
	RNA-seq data	qRT-PCR data
RNA-seq data	1
qRT-PCR data	0.9992	1
MaRop5c
	RNA-seq data	qRT-PCR data
RNA-seq data	1
qRT-PCR data	0.8789	1
MaRop5f
	RNA-seq data	qRT-PCR data
RNA-seq data	1
qRT-PCR data	0.9984	1
MaRop5g
	RNA-seq data	qRT-PCR data
RNA-seq data	1
qRT-PCR data	0.9478	1
MaRop5h
	RNA-seq data	qRT-PCR data
RNA-seq data	1
qRT-PCR data	0.9977	1
