# Supplementary material for: Overexpression of a Novel ROP Gene from the Banana (MaROP5g) Confers Increased Salt Stress Tolerance
Source: Int J Mol Sci. 2018 Oct 11;19(10):3108. doi: 10.3390/ijms19103108 (PMC6213407; doi:10.3390/ijms19103108)
Supplement: Supplementary file 1 [file ijms-19-03108-s001.zip › Table S5.xlsx]

## Sheet: Table S5
Table S5. Primer sequences used for qRT-PCR
Gene	Forward primers (5'-3')	Reverse primers (5'-3')
MaROP3b	TACTATTTGGCAGATCATCCT	AGGCTGAATAACGACTTTGATG
MaROP5a	GCGAGCTATGAAAATGTGGCT	CTGCACTCGATGTAGGCTGC
MaROP5c	GTAAGGCCAGCTACGAAAAT	CTACACTCGATGTAAGCAGC
MaROP5f	CCAGCTATGAGAATGTGGCTAAG	TTCTGCTTGGGCGGTTGAAGCA
MaROP5g	ATGTTTTCTTGCTTGCTTTCTC	AATACCGCCTTGACATTTTGCT
MaROP6	TGTGCCCATAGTTCTTGTTGGA	CTTCTGCTTGGGTGGTTGAAGT
